# Supplementary material for: Kinetic study of the reaction of [Rh6(CO)16] with NO2−: insertion of the nitrogen atom into a Rh6 cluster core
Source: Royal Society of Chemistry journal article supplement (doi:10.1039/b808666d), 2008-01-01
Supplement: b808666d.pdf [file b808666d.pdf]

### ESI pages for

## Kinetic study of the reaction of $[\text{Rh}_6(\text{CO})_{16}]$ with $\text{NO}_2^-$ : Insertion of the nitrogen atom into a $\text{Rh}_6$ cluster core

*Claudia Babij,<sup>a</sup> David H. Farrar,<sup>a</sup> Anthony J. Poë\*<sup>a</sup> and Sergey P. Tunik<sup>b</sup>*

Fig. S1 Typical absorbance changes at 450 nm during step 1 at 25 °C under  $\text{N}_2$ . Data fitted using a single exponential function.

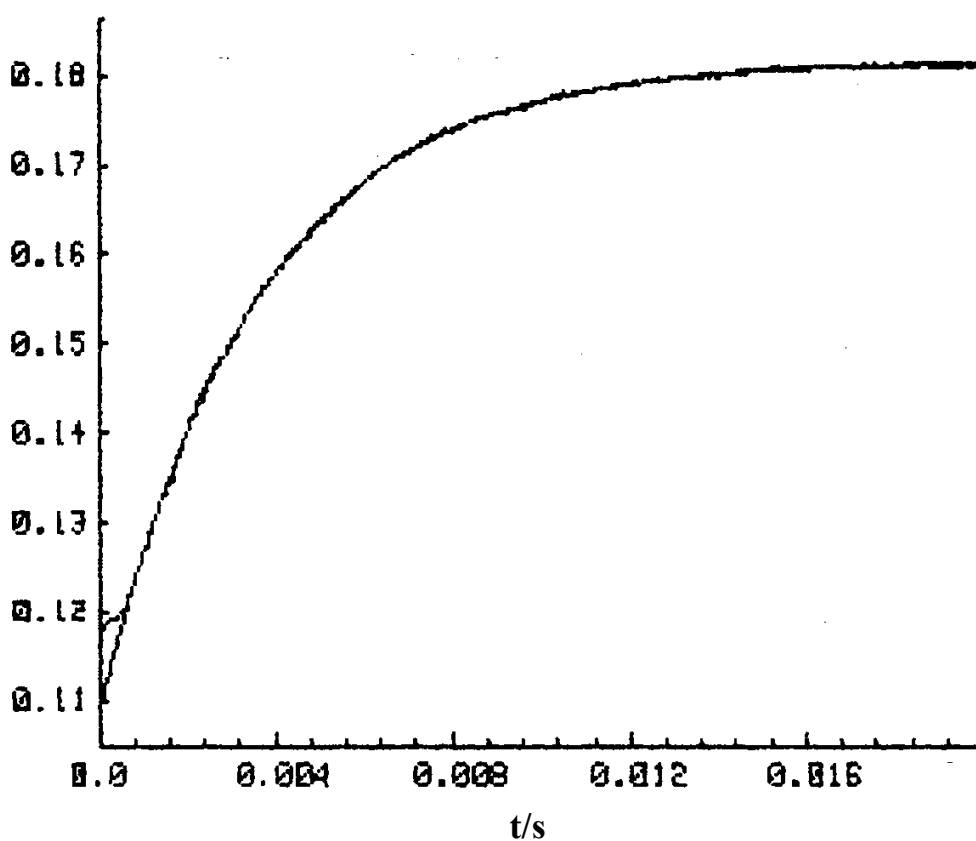

**Fig. S2** Typical plot of absorbance (425 nm) vs. time (t/s) for step 2 at 10 °C under CO. Data fitted using a single exponential function and the “residuals” are also shown (with a much expanded scale).

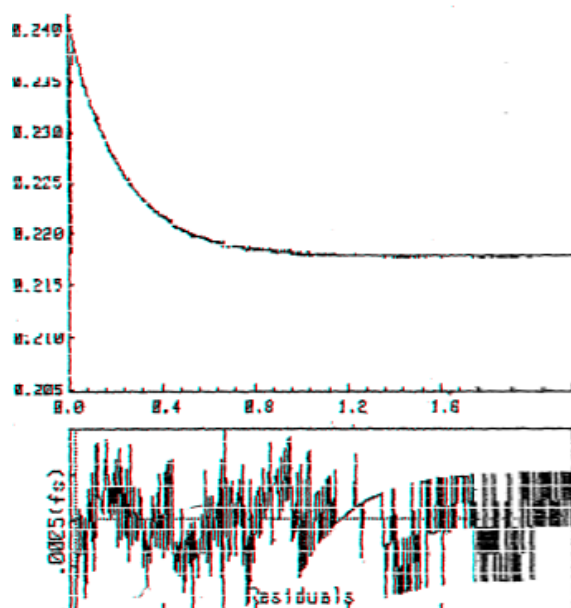

**Fig. S3** Spectrum of the “2013  $\text{cm}^{-1}$  species” established by subtracting the spectra of  $[\text{Rh}_6(\text{CO})_{14}(\kappa^2\text{-OCONO})]^-$  and  $\text{Rh}_6\text{N}(\text{CO})_{15}]^-$  from that of the mixture when the concentration of the “2013  $\text{cm}^{-1}$  species” is at a maximum.

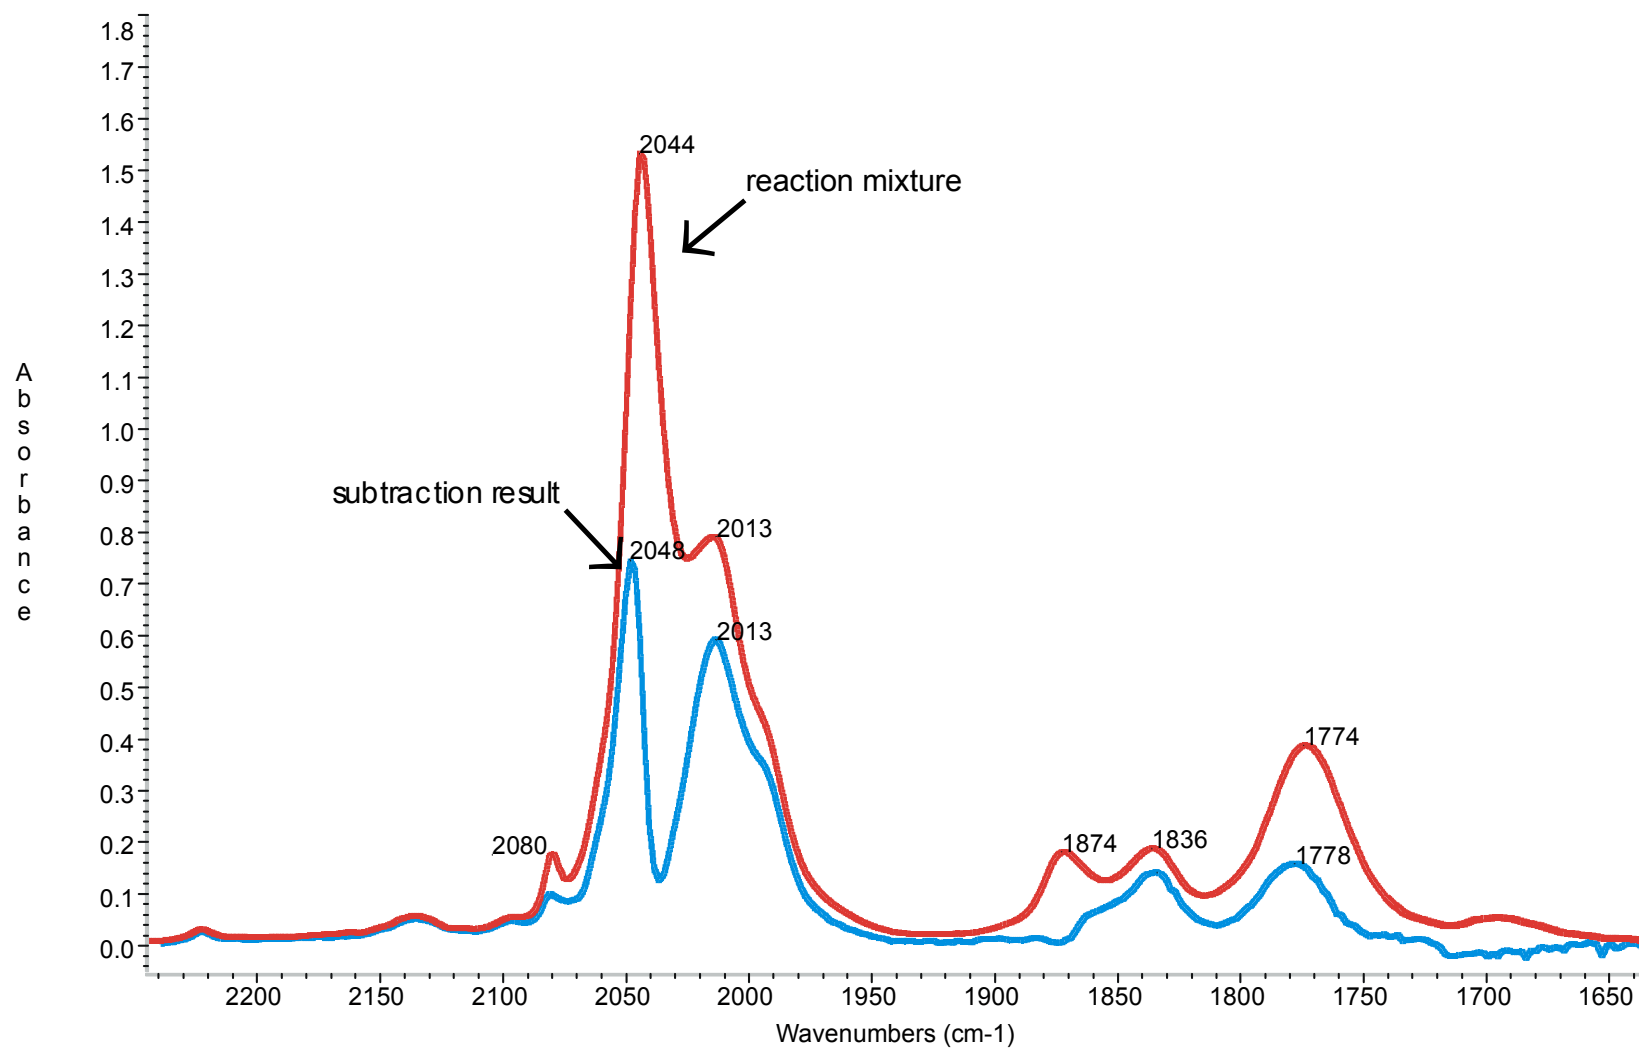



**Table S1** Crystal Data and Structure Refinement for PPN[Rh<sub>6</sub>N(CO)<sub>15</sub>] (Using *SHELXTL/PC*; Bruker Analytical X-ray : Madison, WI, 1997).

|                                   |                                                                                                                          |
|-----------------------------------|--------------------------------------------------------------------------------------------------------------------------|
| Identification code               | k99228                                                                                                                   |
| Empirical formula                 | C <sub>51</sub> H <sub>30</sub> N O <sub>16</sub> P <sub>2</sub> Rh <sub>6</sub>                                         |
| Formula weight                    | 1592.16                                                                                                                  |
| Temperature                       | 150(1) K                                                                                                                 |
| Wavelength                        | 0.71073 Å                                                                                                                |
| Crystal system                    | Triclinic                                                                                                                |
| Space group                       | P-1                                                                                                                      |
| Unit cell dimensions              | a = 9.0540(18) Å $\alpha$ = 109.80(3)°.<br>b = 15.826(3) Å $\beta$ = 91.07(3)°.<br>c = 19.596(4) Å $\gamma$ = 97.02(3)°. |
| Volume                            | 2616.7(9) Å <sup>3</sup>                                                                                                 |
| Z                                 | 2                                                                                                                        |
| Density (calculated)              | 2.021 Mg/m <sup>3</sup>                                                                                                  |
| Absorption coefficient            | 1.980 mm <sup>-1</sup>                                                                                                   |
| F(000)                            | 1542                                                                                                                     |
| Crystal size                      | 0.25 x 0.20 x 0.20 mm <sup>3</sup>                                                                                       |
| Theta range for data collection   | 2.59 to 27.51°.                                                                                                          |
| Index ranges                      | 0 ≤ h ≤ 11, -20 ≤ k ≤ 20, -25 ≤ l ≤ 25                                                                                   |
| Independent reflections           | 11788 [R(int) = 0.064]                                                                                                   |
| Completeness to theta = 27.51°    | 97.9 %                                                                                                                   |
| Absorption correction             | None                                                                                                                     |
| Max. and min. transmission        | 0.6929 and 0.6374                                                                                                        |
| Refinement method                 | Full-matrix least-squares on F <sup>2</sup>                                                                              |
| Data / restraints / parameters    | 11788 / 0 / 686                                                                                                          |
| Goodness-of-fit on F <sup>2</sup> | 1.038                                                                                                                    |
| Final R indices [I > 2σ(I)]       | R1 = 0.0360, wR2 = 0.0815                                                                                                |
| R indices (all data)              | R1 = 0.0496, wR2 = 0.0866                                                                                                |
| Extinction coefficient            | 0.00098(9)                                                                                                               |

Largest diff. peak and hole                      0.948 and -1.210 e.Å<sup>-3</sup>
